# Supplementary material
Source: PubMed Central journal article supplement (PMC8672856)
Supplement: 11655_2021_3504_MOESM1_ESM.pdf [file 11655_2021_3504_MOESM1_ESM.pdf]

Supplementary material to “In silico Screening of Natural Products as Potential Inhibitors of SARS-CoV-2 using Molecular Docking Simulation”

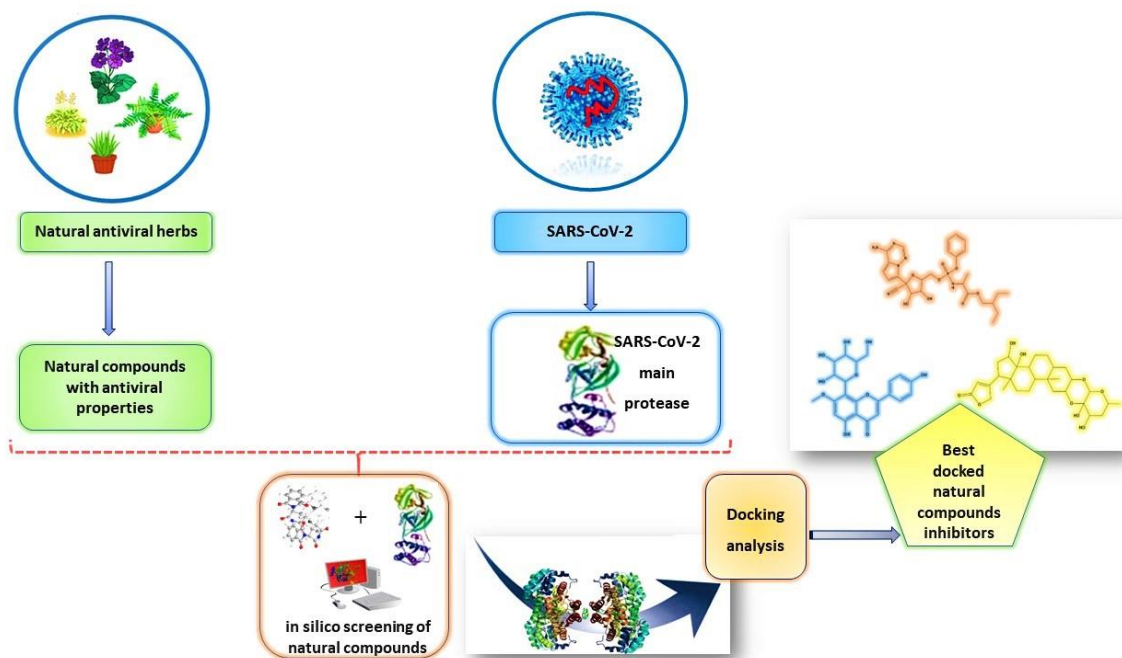

**Appendix 1.** The flow chart of the study.

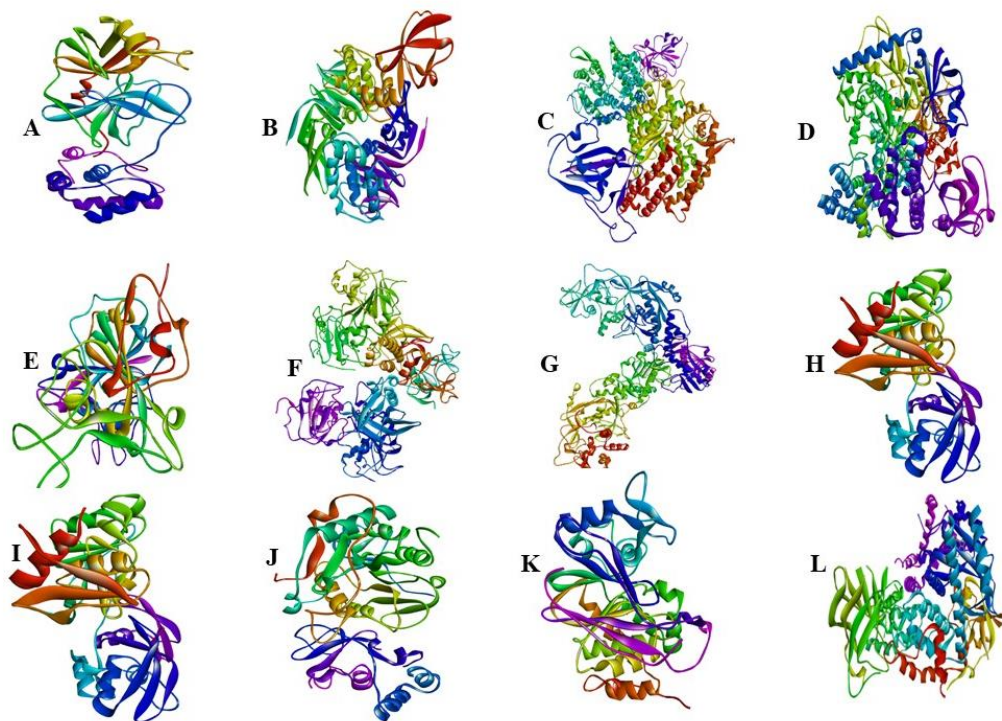

**Appendix 2.** Three dimensional structures of the SARS-CoV proteins [(**A**) 3-chymotrypsin-like protease (3CL<sup>PRO</sup>) (PDB 6LU7), (**B**) Papain-like proteases (PL<sup>PRO</sup>) (PDB 4OW0), (**C**) Human angiotensin converting enzyme 2 receptor (hACE2R) (PDB 2AJF), (**D**) RNA-dependent RNA polymerase (RdRp) (PDB 6NUR), (**E**) SARS spike glycoprotein (S protein) (PDB 2GHV), (**F**) Non-structural protein 13 (nsp13, helicase) (PDB 6JYT), (**G**) Non-structural protein 14 (nsp14) (PDB 5C8S), (**H**) Non-structural protein 15 (nsp15) (PDB 2H85), (**I**) Non-structural protein 16 (nsp16) (PDB 3R24), (**J**) Non-structural protein 10 (nsp10) (PDB 2XYR), (**K**) Calcineurin–NFAT (PDB 2JOG) and (**L**) ABL1 (PDB 6T3B).

**Appendix 3.** Examples of natural product-derived against SARS-CoV-2 potential candidates

| Natural Compounds/<br>Chemical group | Chemical structures                                                                | Coronavirus type targeted/<br>SARS-CoV viral proteases | Mechanism of action              | IC <sub>50</sub> /EC <sub>50</sub> value | Ref  |
|--------------------------------------|------------------------------------------------------------------------------------|--------------------------------------------------------|----------------------------------|------------------------------------------|------|
| Aloe emodin/<br>Anthraquinone        | 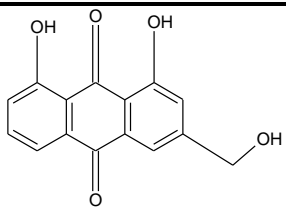  | SARS-CoV                                               | Inhibition of 3CL <sup>PRO</sup> | 8.3 μM                                   | (20) |
| Amentoflavone/<br>Flavonoid          |  | SARS-CoV                                               | Inhibition of 3CL <sup>PRO</sup> | 8.3 μM                                   | (21) |

**Berberamine/  
Alkaloid**

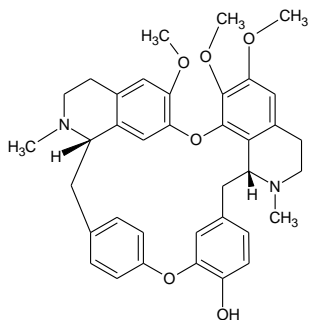

HCoV-NL63

Unknown

1.48  $\mu\text{M}$

(22)

**Betulonic acid/  
Triterpenoid  
derivative**

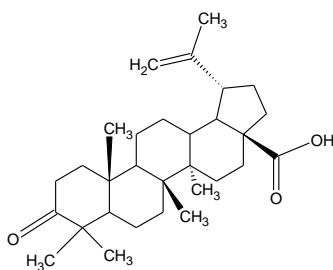

SARS-CoV

Inhibition of virus replication.

0.63  $\mu\text{M}$

(23)

**Betulonic acid/  
Triterpenoid  
derivative**

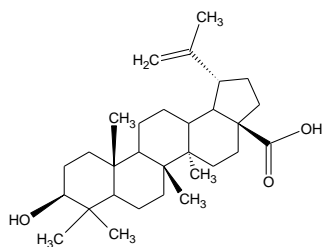

SARS-CoV

Inhibition of 3CL<sup>PRO</sup>.

10  $\mu\text{M}$

**Broussoflavan A/  
Flavonol**

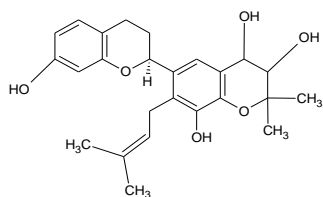

3CL<sup>PRO</sup> and PL<sup>PRO</sup>

Inhibition of PL<sup>PRO</sup>.

9.2  $\mu\text{M}$

(24)

**(-)-Catechin  
gallate/  
Flavonoid**

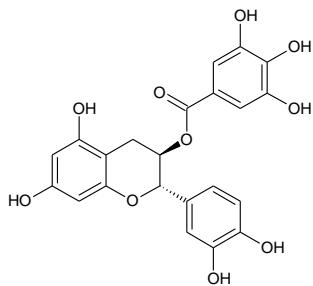

SARS-CoV

Inhibition of nanoparticle-  
based RNA oligonucleotide.

-

(19)

**Cepharanthine/  
Alkaloid**

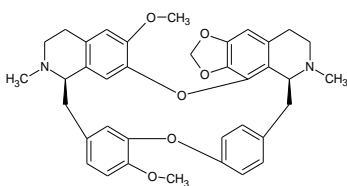

SARS-CoV

Protease inhibition.

9.5  $\mu\text{g}/\text{mL}$

(25)

**Ferruginol/  
Diterpenoid**

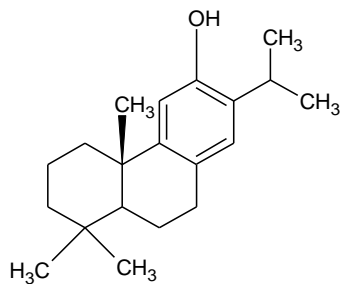

SARS-CoV

Inhibition of virus replication.

1.39  $\mu\text{M}$

(23)

**(-)-Gallocatechin  
gallate/  
Polyphenol**

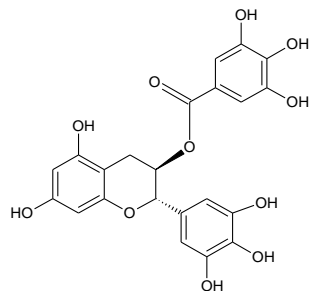

SARS-CoV

Inhibition of nanoparticle-  
based RNA oligonucleotide.

-

(19)

**Glucogallin/  
Polyphenol**

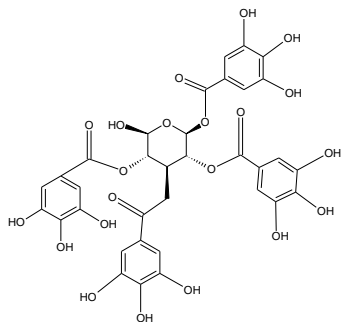

SARS-CoV

Blocking the viral entry.

4.5 μM

(26)

**Juglanin/  
Flavonoid**

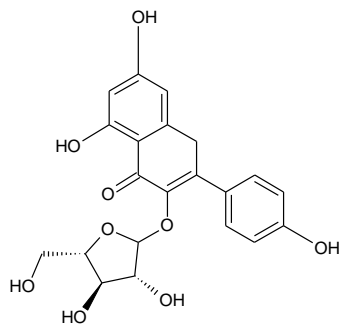

SARS-CoV

Blocks the 3a channel.

2.3 μM

(27)

**Luteolin/  
Flavonoid**

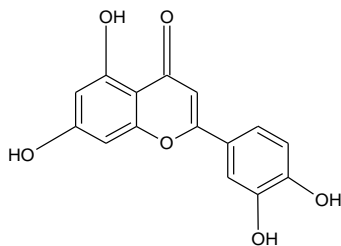

SARS-CoV

Blocking the viral entry.

9.02 μM

(26)

**Papyriflavonol A/  
Flavonol**

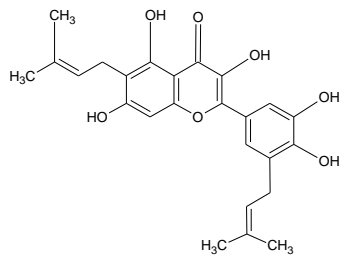

3CL<sup>PRO</sup> and PL<sup>PRO</sup>

Protease inhibition.

3.7 μM

(24)

**Psoraldin/  
Coumarin**

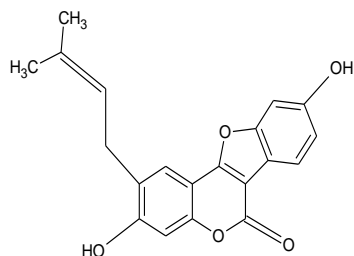

SARS-CoV

Inhibition of PL<sup>PRO</sup>

4.2±1.0 μM

(19)

**Quercetin/  
Flavonoid**

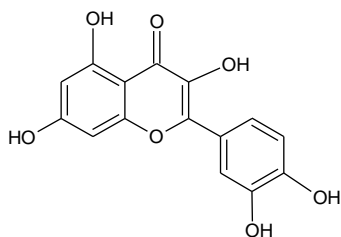

3CL<sup>PRO</sup> and PL<sup>PRO</sup>

Inhibition of PL<sup>PRO</sup>.

8.7 μM

(24)

**Tannic acid/  
Polyphenol**

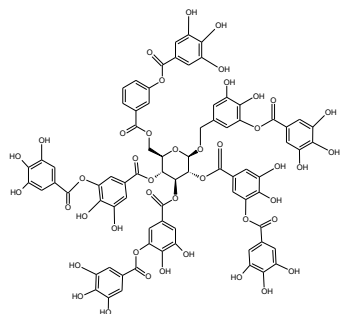

SARS-CoV

Inhibition of virus replication.

1.57 μM

(23)

**Tanshinone I/  
Diterpene**

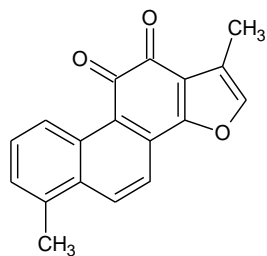

SARS-CoV

Inhibition of SARS-CoV viral  
infection and replication.

0.7  $\mu$ M

(34)

**Tomentin A/  
Flavonoid**

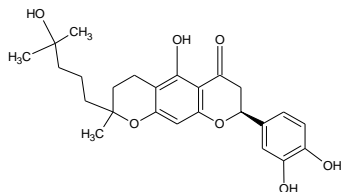

SARS-CoV

Inhibition of PL<sup>PRO</sup>.

6.2  $\pm$  0.04  $\mu$ M

**Tomentin B/  
Flavonoid**

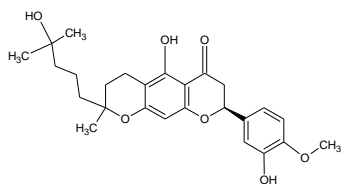

SARS-CoV

Inhibition of PL<sup>PRO</sup>.

6.1  $\pm$  0.02  $\mu$ M

(29)

**Tomentin E/  
Flavonoid**

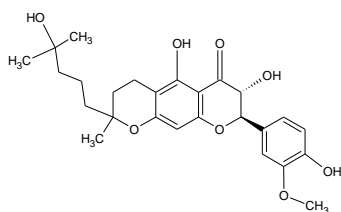

SARS-CoV

Inhibition of PL<sup>PRO</sup>.

5.0  $\pm$  0.06  $\mu$ M



**Tylophorine/  
Alkaloid**

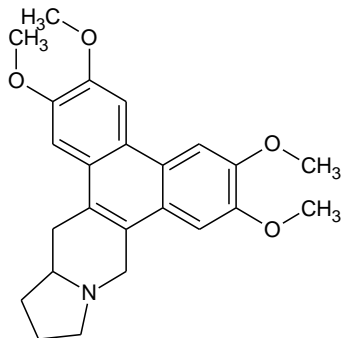

SARS-CoV

Protease inhibition.

0.018  $\mu$ M

(28)

**3'-O-  
methyldiplacol/  
Flavone**

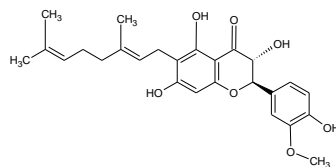

SARS-CoV

Inhibition of PL<sup>PRO</sup>

9.5  $\pm$  0.10  $\mu$ M

(29)

**4'-O-  
methyldiplacol/  
Flavone**

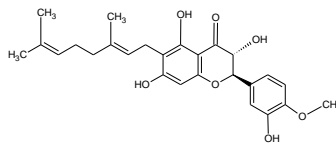

SARS-CoV

Inhibition of PL<sup>PRO</sup>

9.2  $\pm$  0.13  $\mu$ M

(29)

**7-  
methoxycryptop-  
eurine/  
Flavone**

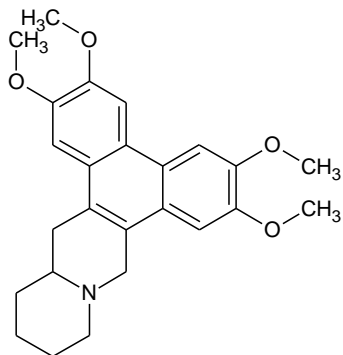

SARS-CoV

Protease inhibition.

<0.005  $\mu$ M

(28)

**Abbreviations:** papain-like protease (PL<sup>pro</sup>), 3-chymotrypsin-like protease (3CL<sup>pro</sup>), severe acute respiratory syndrome coronavirus (SARS-CoV), Human coronavirus NL63 (HCoV-NL63)

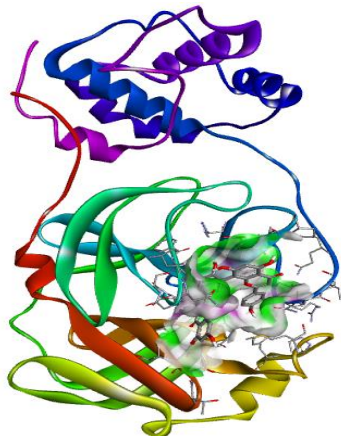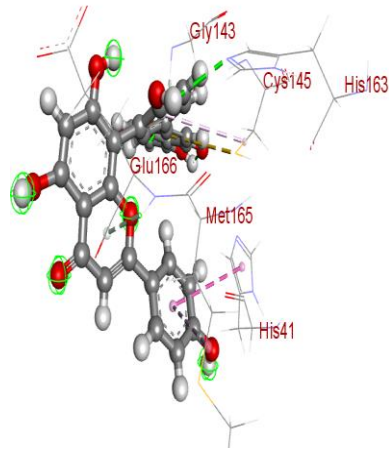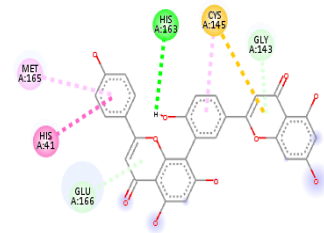

**Interactions**

- Conventional Hydrogen Bond
- Pi-Donor Hydrogen Bond
- Pi-Sulfur
- Pi-Pi T-shaped
- Pi-Alkyl

(A) Amentoflavone - 3CL<sup>PRO</sup>

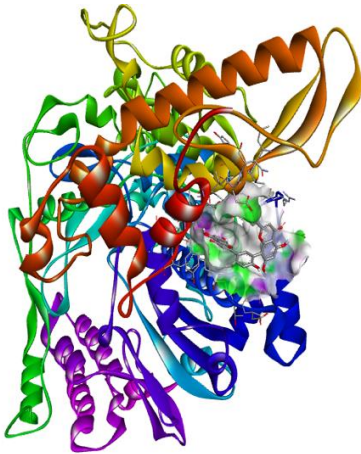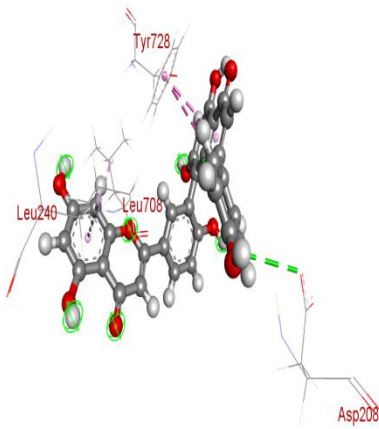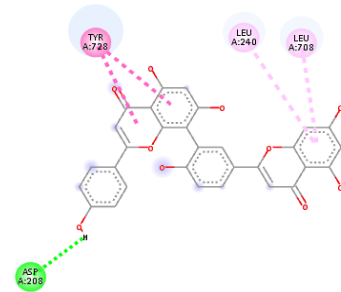

**Interactions**

- Conventional Hydrogen Bond
- Pi-Pi Stacked
- Pi-Alkyl

(B) Amentoflavone - RdRp

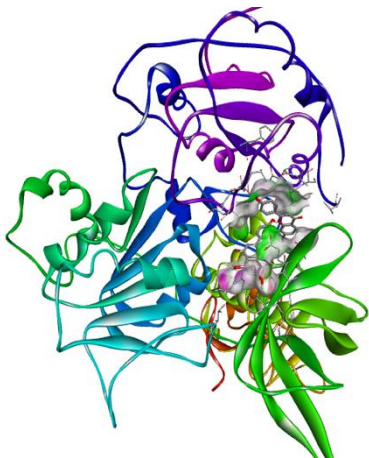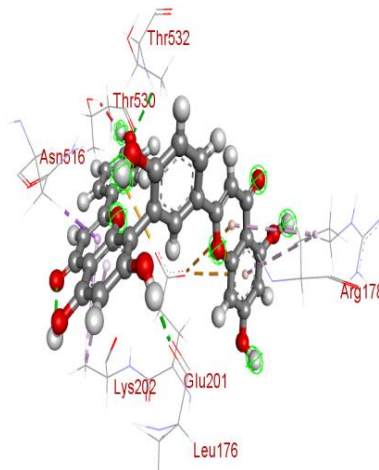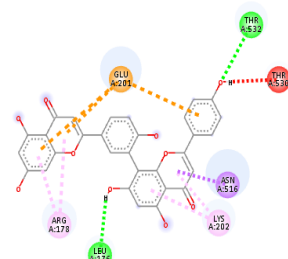

**Interactions**

- Conventional Hydrogen Bond
- Unfavorable Donor-Donor
- Pi-Anion
- Pi-Sigma
- Pi-Alkyl

(C) Amentoflavone - nsp13

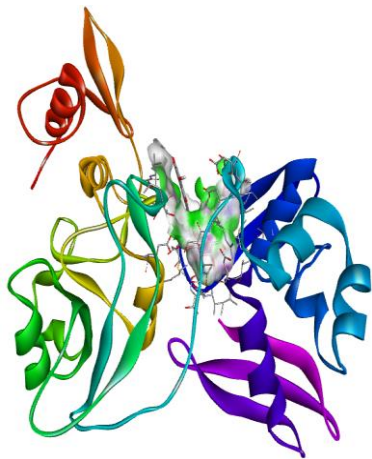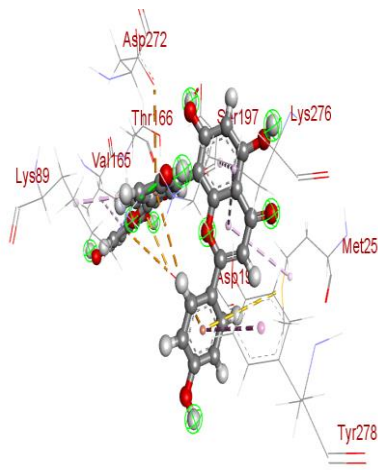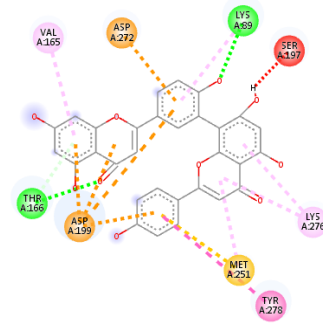

- Interactions**
- Conventional Hydrogen Bond
  - Unfavorable Donor-Donor
  - Pi-Anion
  - Pi-Donor Hydrogen Bond
  - Pi-Sulfur
  - Pi-Pi T-shaped
  - Pi-Alkyl

(D) Amentoflavone - nsp15

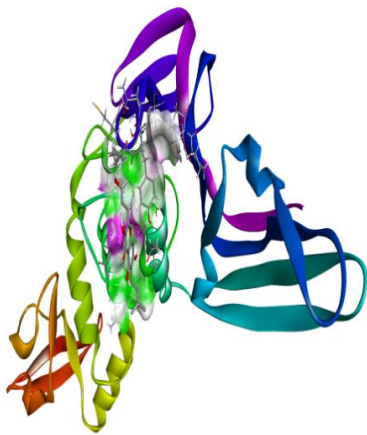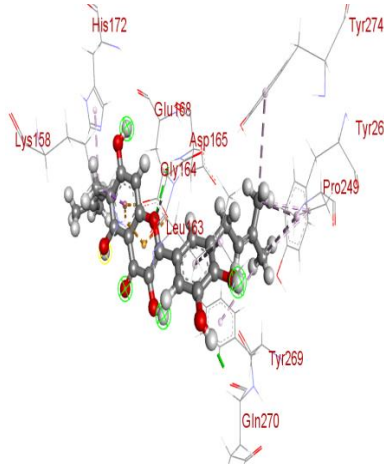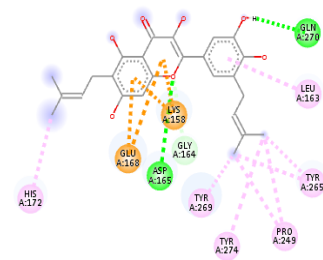

- Interactions**
- Conventional Hydrogen Bond
  - Carbon Hydrogen Bond
  - Pi-Cation
  - Pi-Anion
  - Pi-Sigma
  - Alkyl
  - Pi-Alkyl

(E) Papyriflavonol A - PL<sup>PRO</sup>

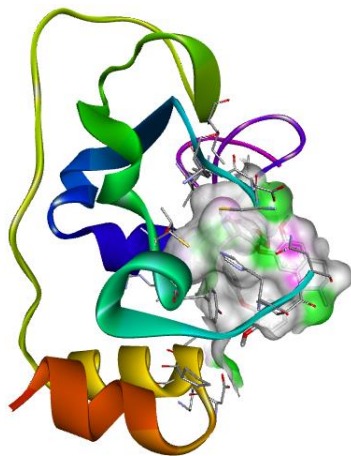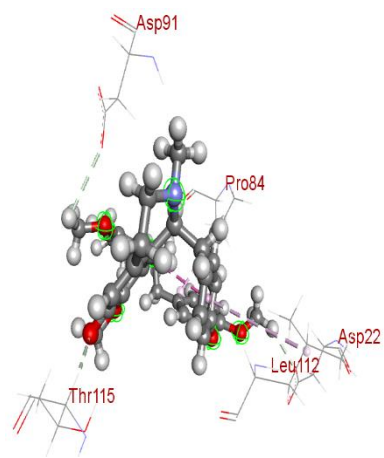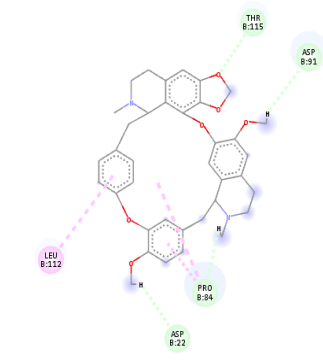

- Interactions**
- Carbon Hydrogen Bond
  - Alkyl
  - Pi-Alkyl

(F) Cepharanthine – nsp10

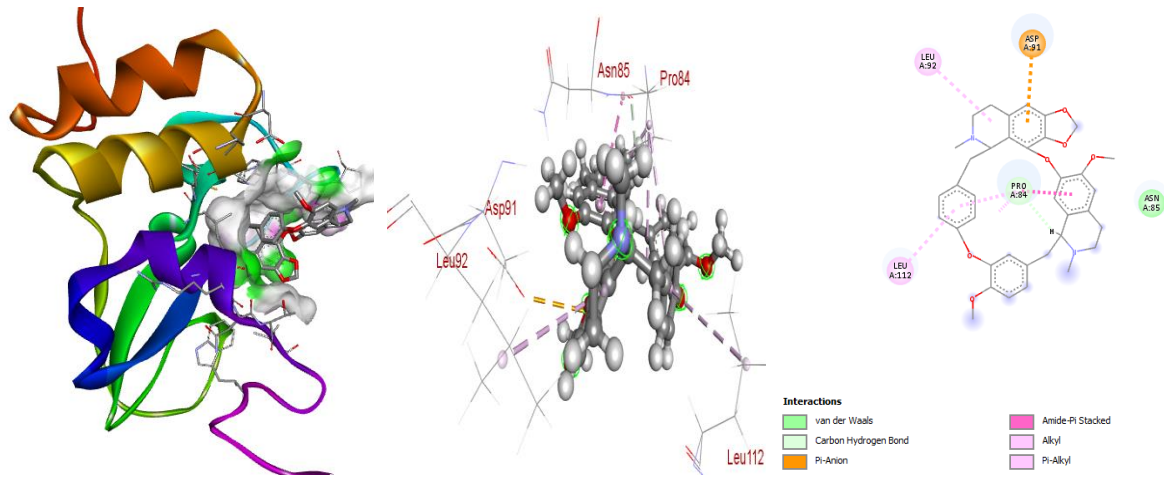

(G) Cepharanthine – nsp14

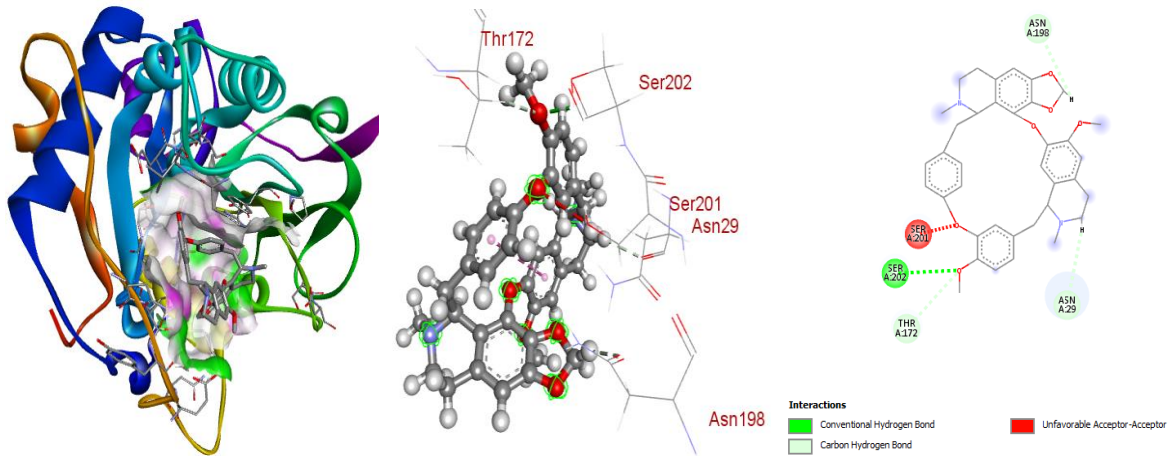

(H) Cepharanthine – nsp16

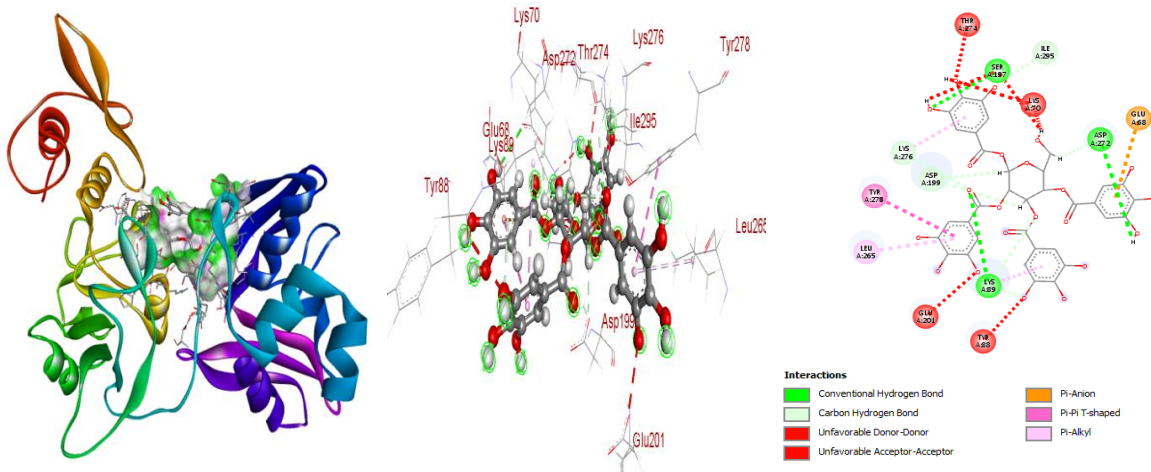

(I) Glucogallin – nsp15

**Appendix 4.** Interactions of the natural compounds with different structural and non-structural proteins of SARS CoV-2.



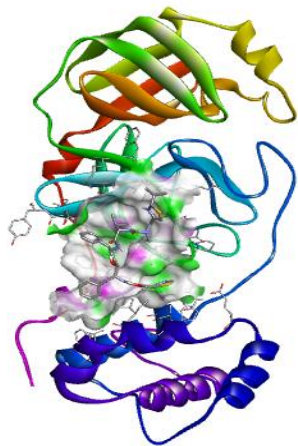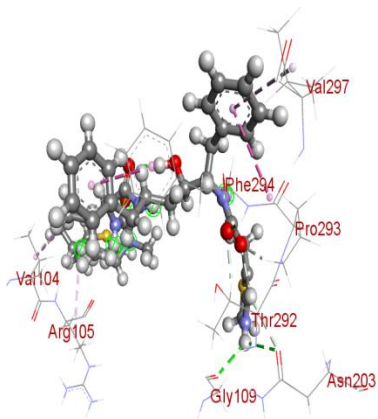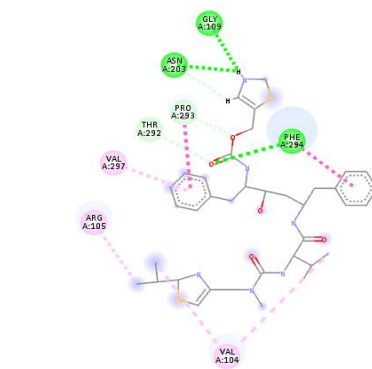

**Interactions**

|                                                                 |                                                             |
|-----------------------------------------------------------------|-------------------------------------------------------------|
| <span style="color: green;">■</span> Conventional Hydrogen Bond | <span style="color: magenta;">■</span> Amide- $\pi$ Stacked |
| <span style="color: lightgreen;">■</span> Carbon Hydrogen Bond  | <span style="color: lightblue;">■</span> Alkyl              |
| <span style="color: pink;">■</span> $\pi$ - $\pi$ Stacked       | <span style="color: lightpurple;">■</span> $\pi$ -Alkyl     |

(A) Ritonavir - 3CL<sup>PRO</sup>

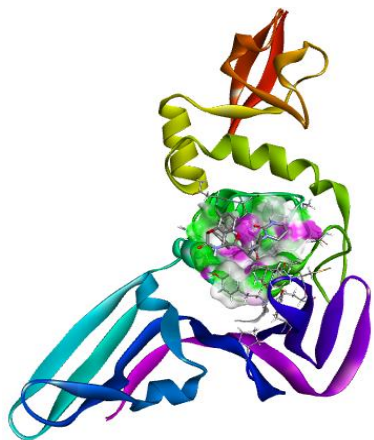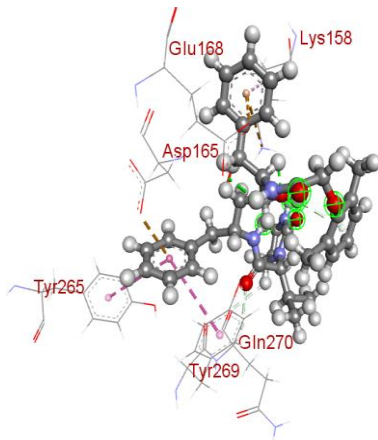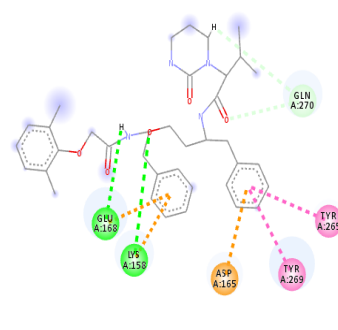

**Interactions**

|                                                                 |                                                                 |
|-----------------------------------------------------------------|-----------------------------------------------------------------|
| <span style="color: green;">■</span> Conventional Hydrogen Bond | <span style="color: magenta;">■</span> $\pi$ - $\pi$ Stacked    |
| <span style="color: lightgreen;">■</span> Carbon Hydrogen Bond  | <span style="color: lightblue;">■</span> $\pi$ - $\pi$ T-shaped |
| <span style="color: orange;">■</span> $\pi$ -Cation             | <span style="color: lightpurple;">■</span> $\pi$ -Alkyl         |
| <span style="color: blue;">■</span> $\pi$ -Anion                |                                                                 |

(B) Lopinavir - PL<sup>PRO</sup>

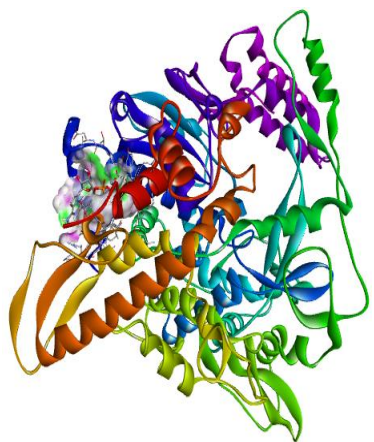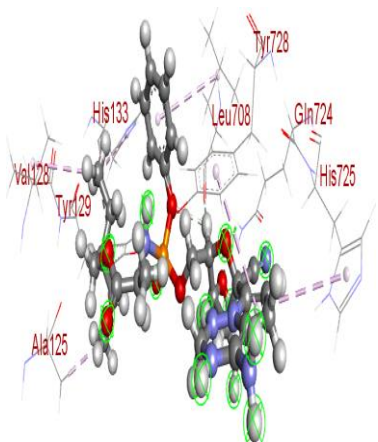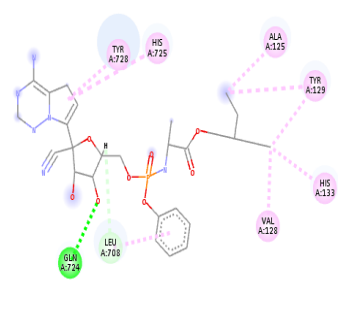

**Interactions**

|                                                                 |                                                       |
|-----------------------------------------------------------------|-------------------------------------------------------|
| <span style="color: green;">■</span> Conventional Hydrogen Bond | <span style="color: magenta;">■</span> Alkyl          |
| <span style="color: lightgreen;">■</span> Carbon Hydrogen Bond  | <span style="color: lightblue;">■</span> $\pi$ -Alkyl |

(C) Remdesivir - RdRp

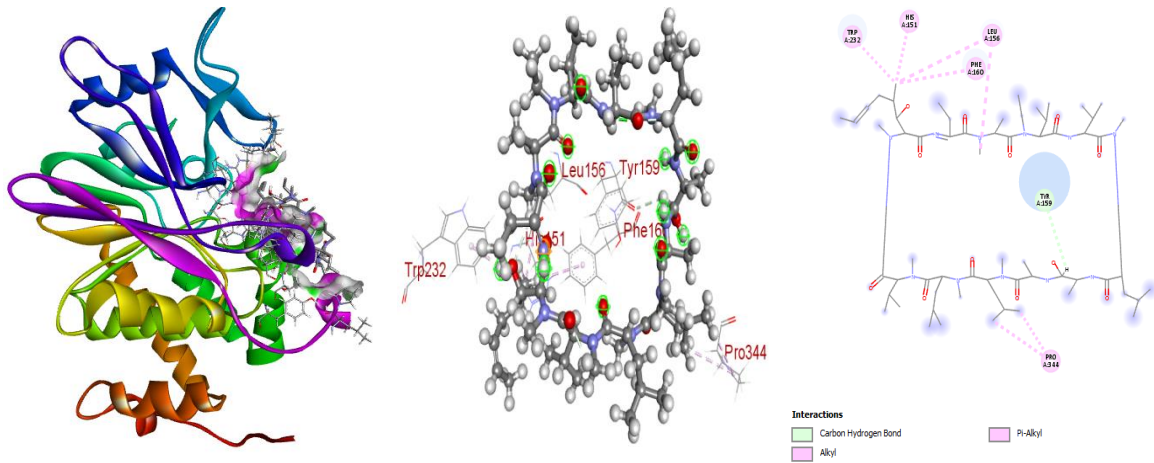

(D) Alisporivir - NFAT

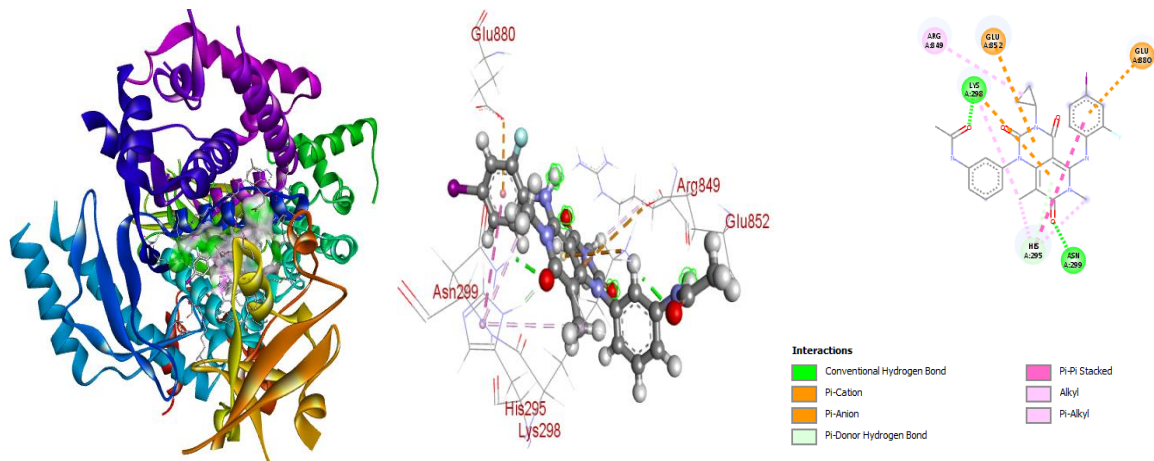

(E) Trametinib - ABL1

**Appendix 5.** Interactions of the standard drugs with the structural and non-structural proteins of SARS CoV-2.



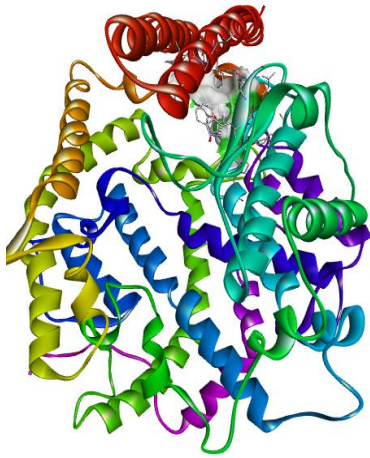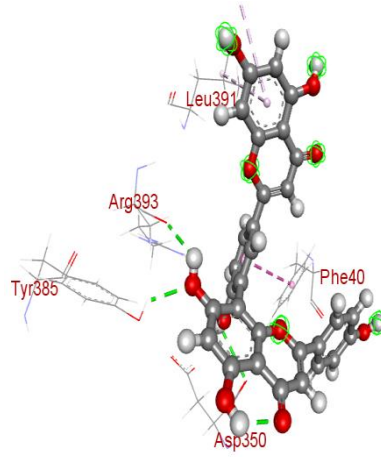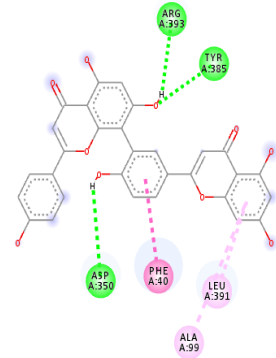

**Interactions**  
■ Conventional Hydrogen Bond  
■ Pi-Pi Stacked  
■ Pi-Alkyl

(A) Amentoflavone - hACE2R

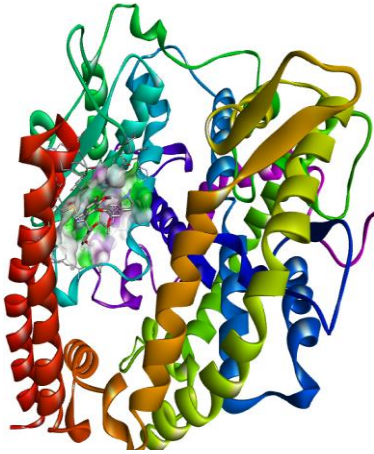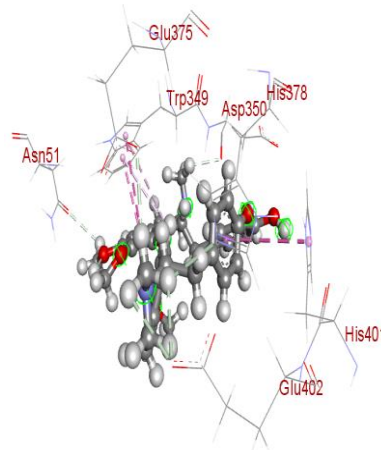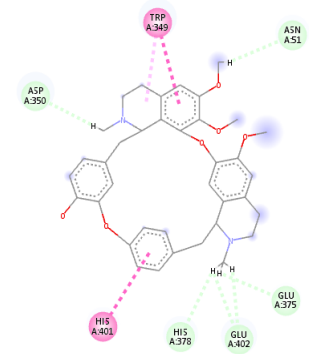

**Interactions**  
■ Carbon Hydrogen Bond  
■ Pi-Pi Stacked  
■ Pi-Alkyl

(B) Berbamine - hACE2R

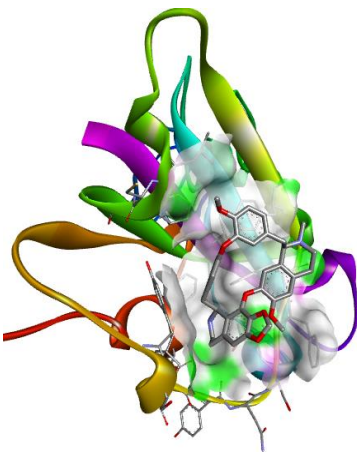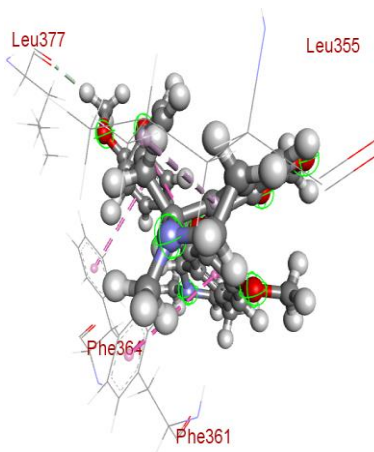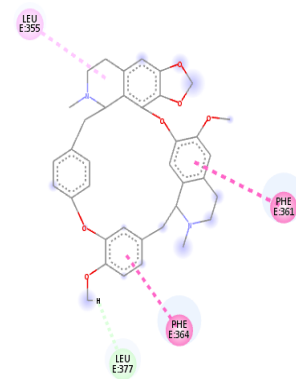

**Interactions**  
■ Carbon Hydrogen Bond  
■ Pi-Pi Stacked  
■ Pi-Pi T-shaped  
■ Alkyl

(C) Cepharanthine - S protein

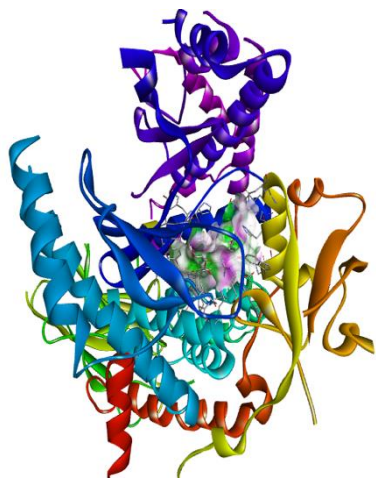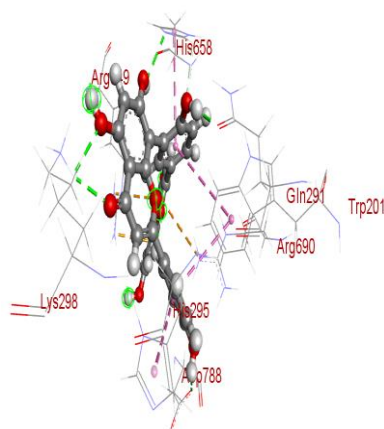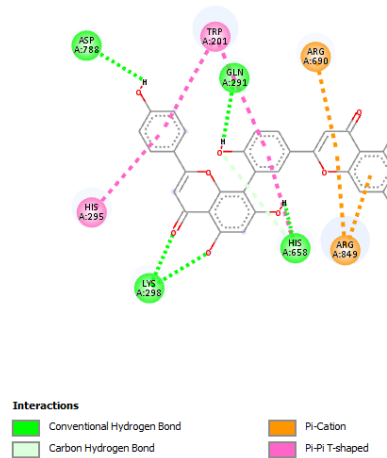

(D) Amentoflavone - ABL1

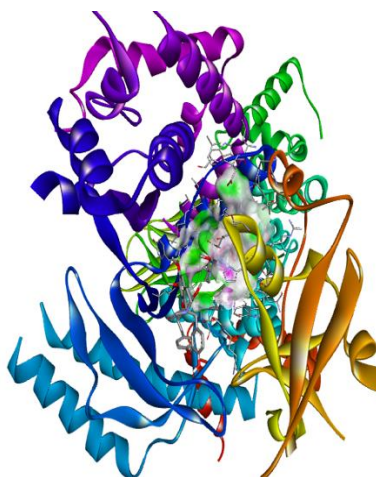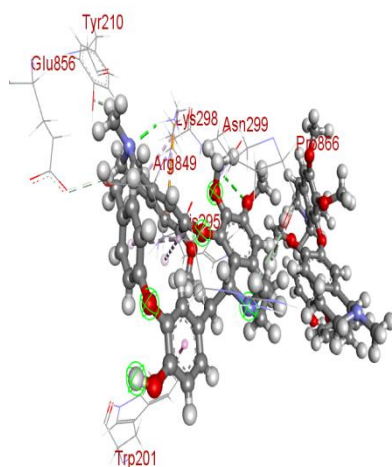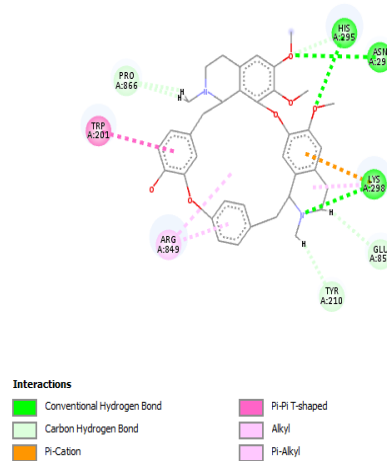

(E) Berbamine - ABL1

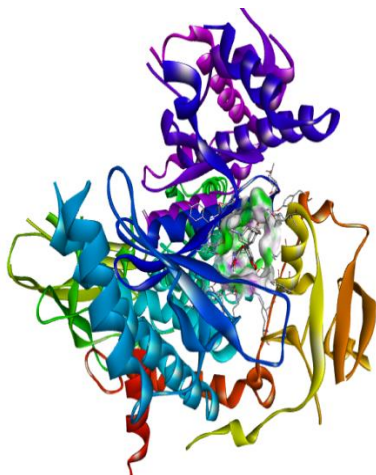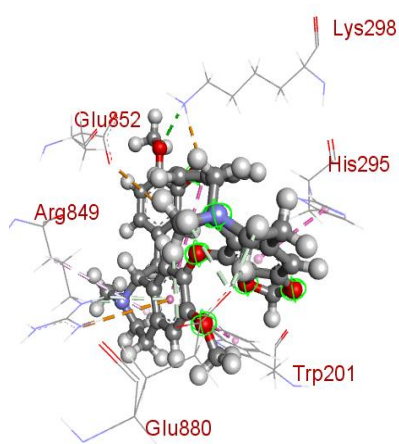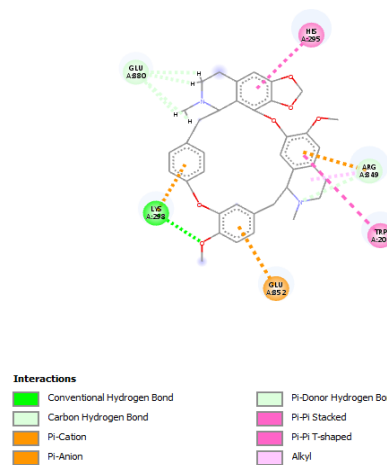

(F) Cepharanthine - ABL1

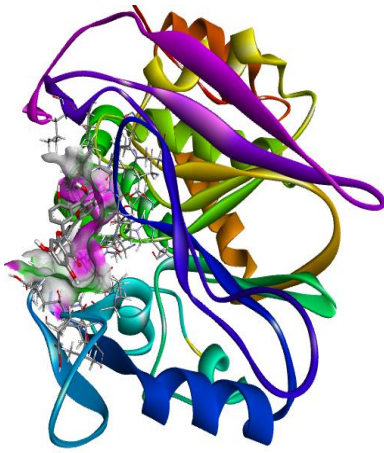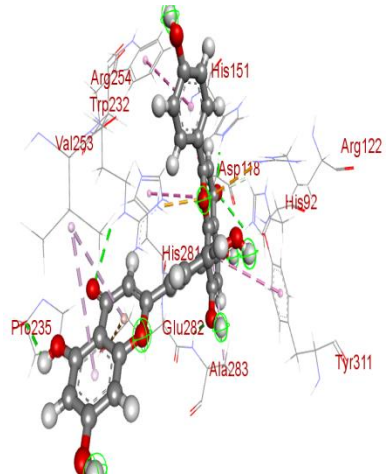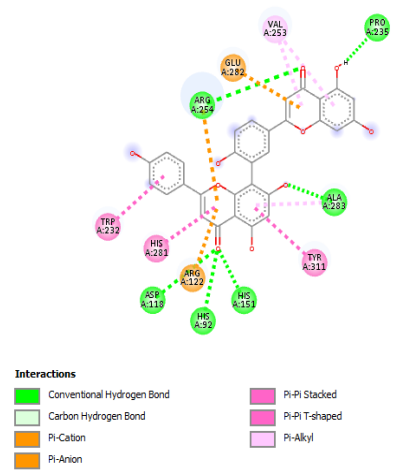

(G) Amentoflavone - calcineurin–NFAT

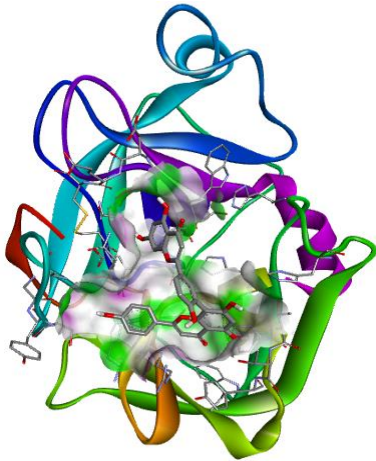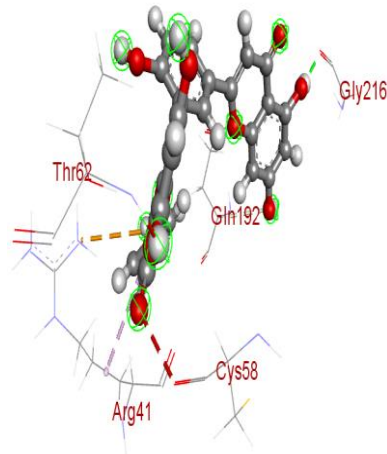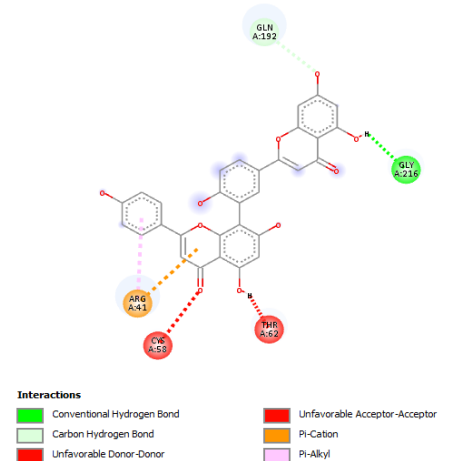

(E) Amentoflavone - Tmprss2

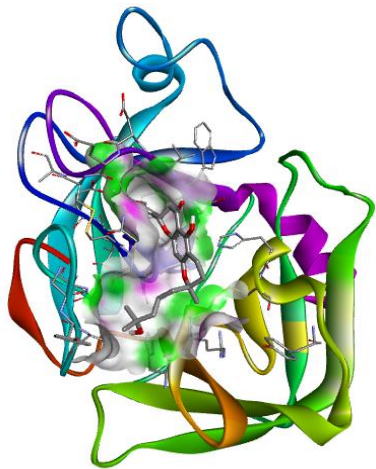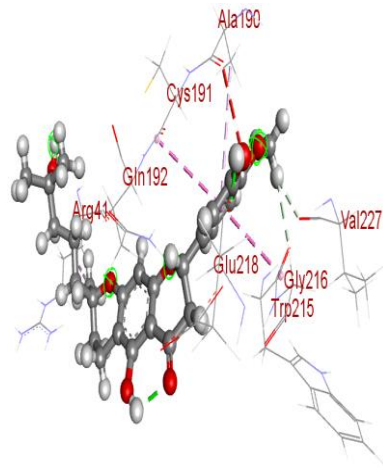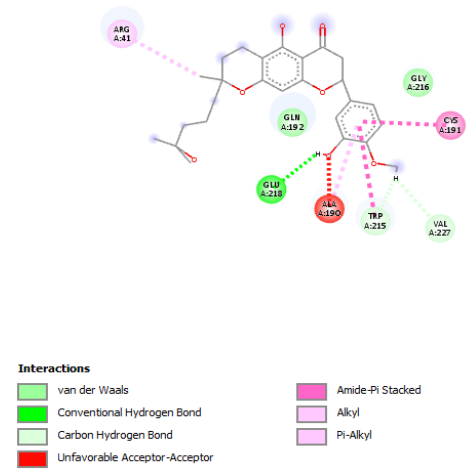

(F) Tomentin B - Tmprss2



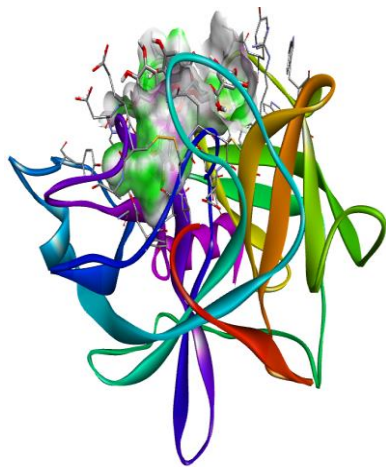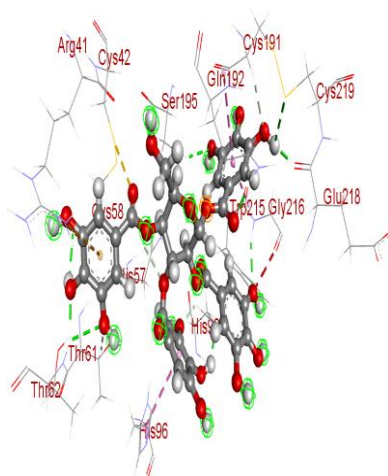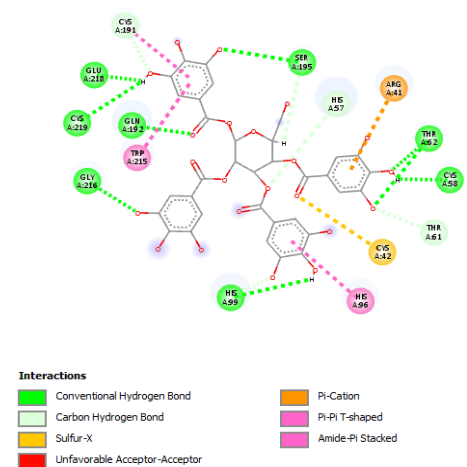

(G) Glucogallin - TMPRSS2

**Appendix 6.** Interactions of the natural compounds with different structural proteins of SARS CoV-2.
